# Supplementary material for: Clinical significance on Switching CDK4/6 inhibitors among 13,284 patients with metastatic breast cancer
Source: Research Square preprint supplement (doi:10.21203/rs.3.rs-6616110/v1), 2025-05-20
Supplement: Supplementary file 1 [file 49fa7bc9ff799cd94ee598ca.docx]

**Supplementary Table 1　Percentage of each regimen pattern**


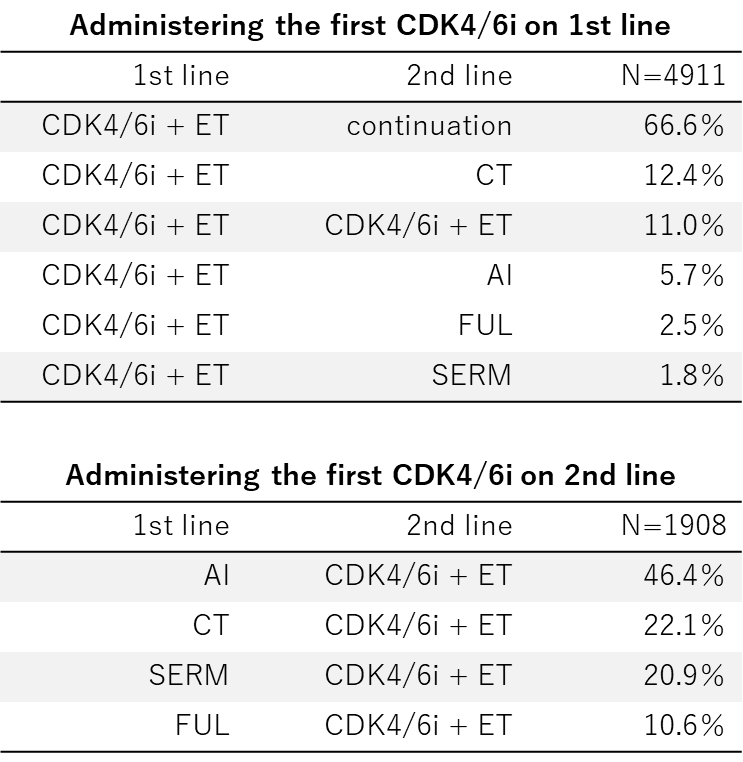


**Supplementary Figure 1　 Patterns of regimens in group A**


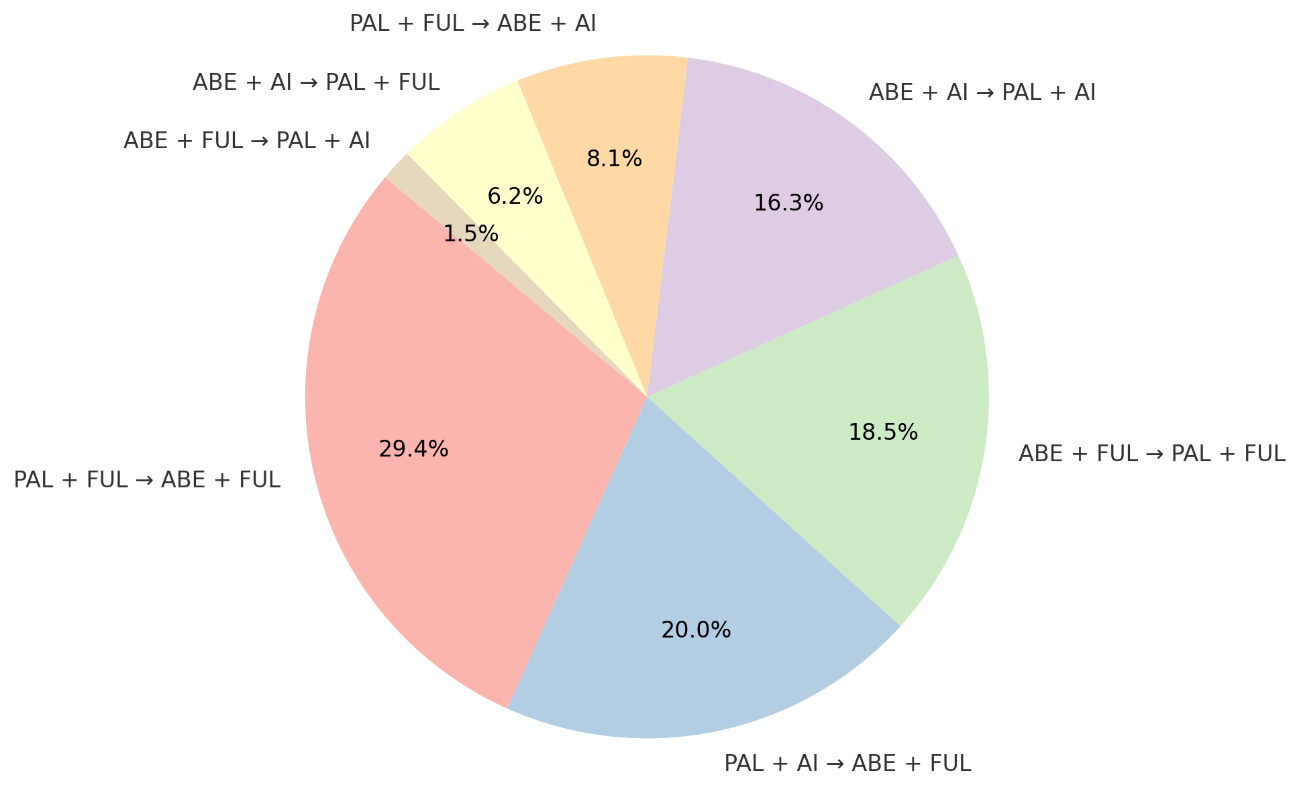


A pie chart illustrates the distribution of combined ET used with CDK4/6i and the sequencing of Abemaciclib and Palbociclib when switching CDK4/6i in group A patients. Combined ET is categorized as either Fulvestrant (FUL) or aromatase inhibitor (AI).

**Supplementary Figure 2　Total TTD of first- and second-line in group A and B**


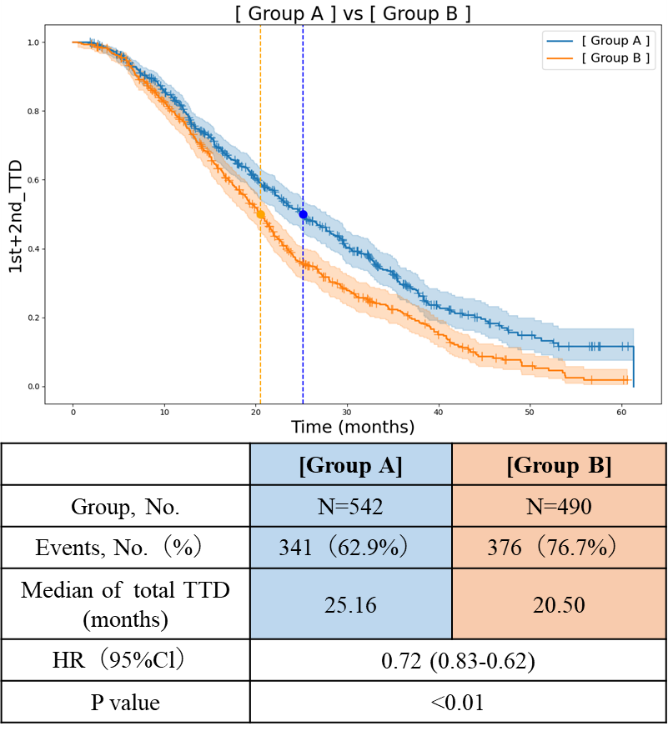


Kaplan-Meier estimates of total TTD of first- and second-line are shown for group A and B.

**Supplementary Figure 3a　 Second-line TTD on the order of palbociclib (PAL) and abemaciclib (ABE)**


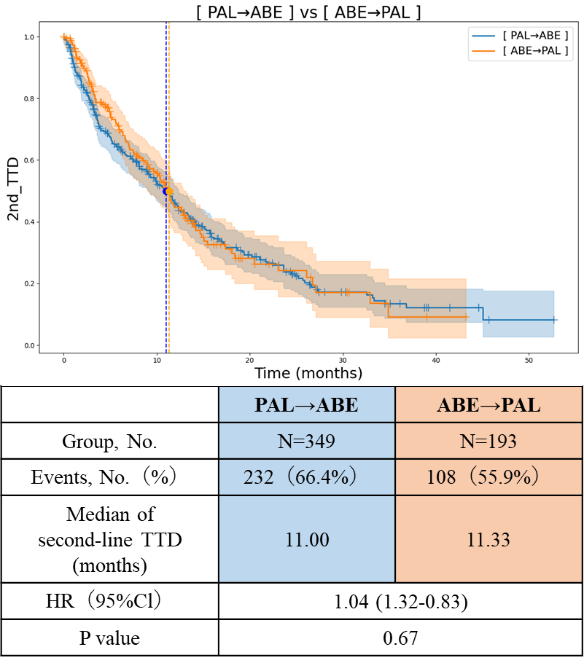


**Supplementary Figure 3b　 Total TTD of first- and second-line on the order of palbociclib (PAL) and abemaciclib (ABE)**


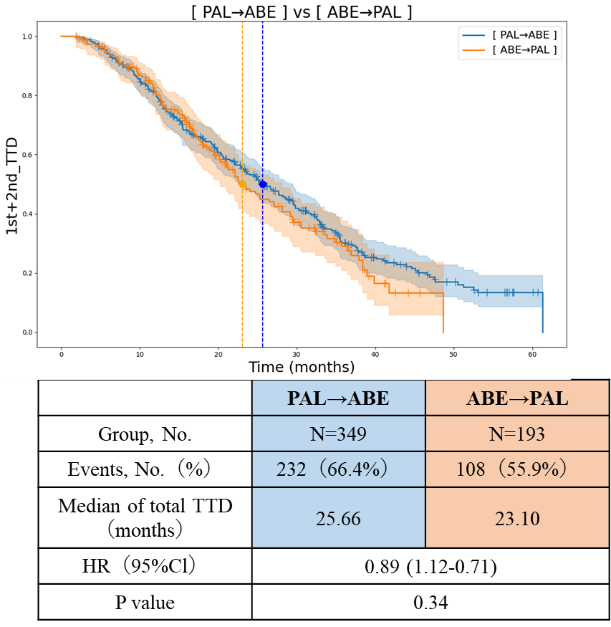


Kaplan-Meier estimates of TTD are shown for group A patients who switched from palbociclib to abemaciclib (PAL→ABE) and those who switched from abemaciclib to palbociclib (ABE→PAL). Supplementary Figure 3a shows second-line TTD, while Supplementary Figure 3b shows total TTD of first- and second-line.

**Supplementary Table 2　Sub-analysis in group A**


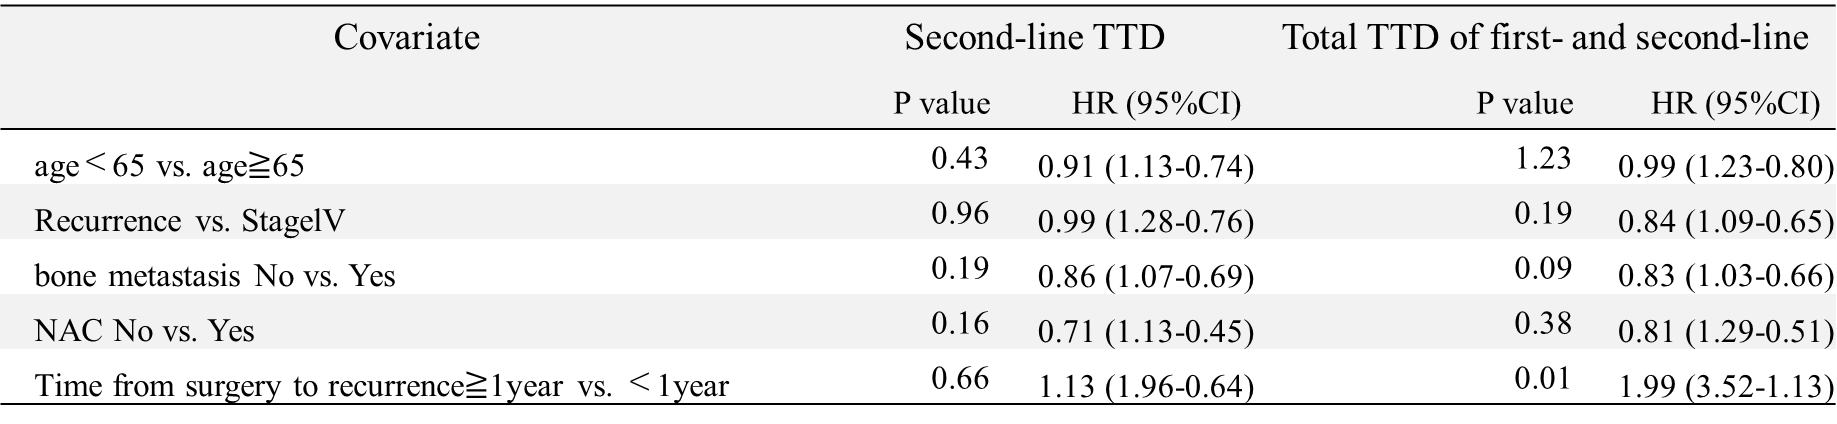


**Supplementary Figure 4　Total TTD of first- and second-line in group A and C**


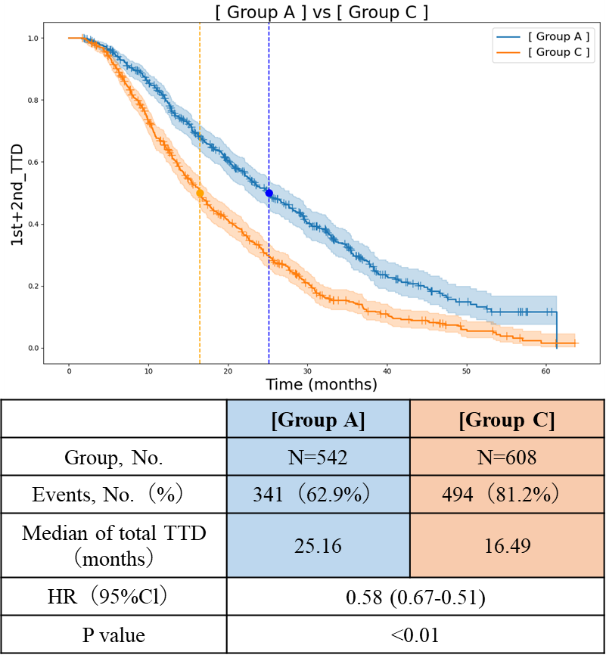


Kaplan-Meier estimates of total TTD of first- and second-line are shown for group A and C.
